# Supplementary material
Source: PubMed Central journal article supplement (PMC2533108)
Supplement: NIHMS60332-supplement-SI1.pdf [file NIHMS60332-supplement-SI1.pdf]

## Supplementary Information for

# Sulfur K-edge XAS and DFT calculations on superoxide reductase: Role of the axial thiolate in reactivity

*Abhishek Dey,<sup>†</sup> Francis E. Jenney Jr.,<sup>‡</sup> Michael W. W. Adams,<sup>‡</sup> Michael K. Johnson,<sup>‡</sup>*

*Keith O. Hodgson,<sup>†‡\*</sup> Britt Hedman,<sup>‡\*</sup> Edward I. Solomon<sup>†‡\*</sup>*

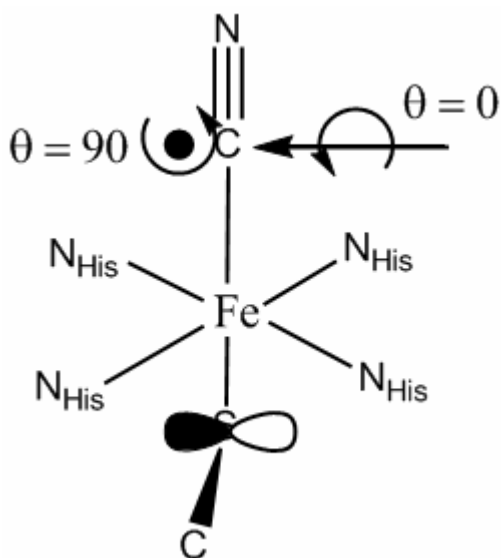

The orientation of the H-bonding or the direction of bending has a significant effect on the localization of the  $t_2$  hole in the low-spin  $\text{CN}^-$  bound form. Both of the above mentioned perturbations can be caused either along ( $\theta=90^\circ$ ) or perpendicular to ( $\theta=0^\circ$ ) the Fe-C-S plane (Figure on the left). Bending the Fe-CN along  $\theta=90^\circ$  axis selectively weakens the Fe-CN

backbonding to the Fe-S  $d\pi$  orbital which now ends up as the LUMO. Likewise H-bonding from the  $\theta=0$  orientation only will weaken the backbonding to the Fe-S  $d\pi$  orbital.

Fig. S1: EPR spectrum of the CN bound form @8K, 10mW, ModAmp 20

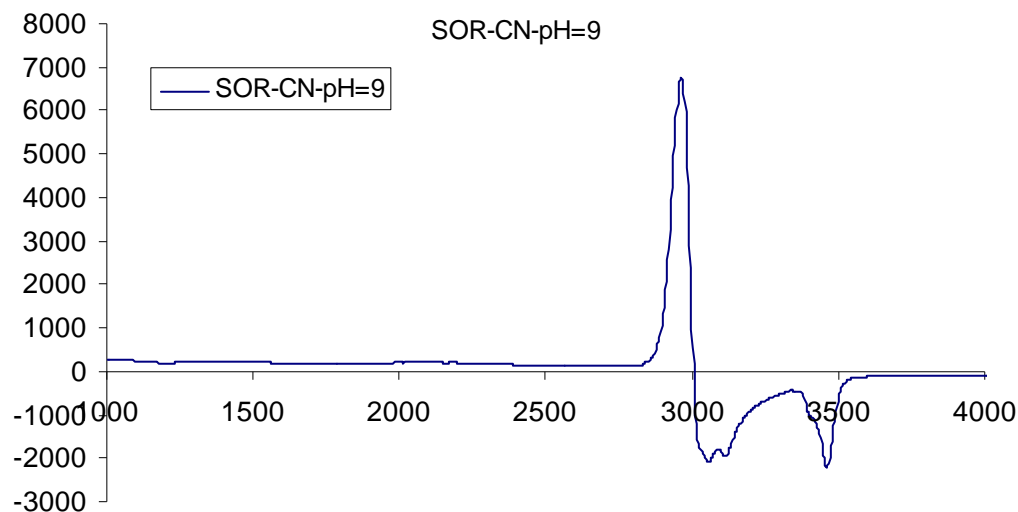

Full reference 41:

Gaussian 03, Revision C.02, Frisch, M. J.; Trucks, G. W.; Schlegel, H. B.; Scuseria, G. E.; Robb, M. A.; Cheeseman, J. R.; Montgomery, Jr., J. A.; Vreven, T.; Kudin, K. N.; Burant, J. C.; Millam, J. M.; Iyengar, S. S.; Tomasi, J.; Barone, V.; Mennucci, B.; Cossi, M.; Scalmani, G.; Rega, N.; Petersson, G. A.; Nakatsuji, H.; Hada, M.; Ehara, M.; Toyota, K.; Fukuda, R.; Hasegawa, J.; Ishida, M.; Nakajima, T.; Honda, Y.; Kitao, O.; Nakai, H.; Klene, M.; Li, X.; Knox, J. E.; Hratchian, H. P.; Cross, J. B.; Bakken, V.; Adamo, C.; Jaramillo, J.; Gomperts, R.; Stratmann, R. E.; Yazyev, O.; Austin, A. J.; Cammi, R.; Pomelli, C.; Ochterski, J. W.; Ayala, P. Y.; Morokuma, K.; Voth, G. A.; Salvador, P.; Dannenberg, J. J.; Zakrzewski, V. G.; Dapprich, S.; Daniels, A. D.; Strain, M. C.; Farkas, O.; Malick, D. K.; Rabuck, A. D.; Raghavachari, K.; Foresman, J. B.; Ortiz, J. V.; Cui, Q.; Baboul, A. G.; Clifford, S.; Cioslowski, J.; Stefanov, B. B.; Liu, G.; Liashenko, A.; Piskorz, P.; Komaromi, I.; Martin, R. L.; Fox, D. J.; Keith, T.; Al-Laham, M. A.; Peng, C. Y.; Nanayakkara, A.; Challacombe, M.; Gill, P. M. W.; Johnson, B.; Chen, W.; Wong, M. W.; Gonzalez, C.; and Pople, J. A.; Gaussian, Inc., Wallingford CT, 2004.

Scheme S1: Reaction scheme without H-bonding:

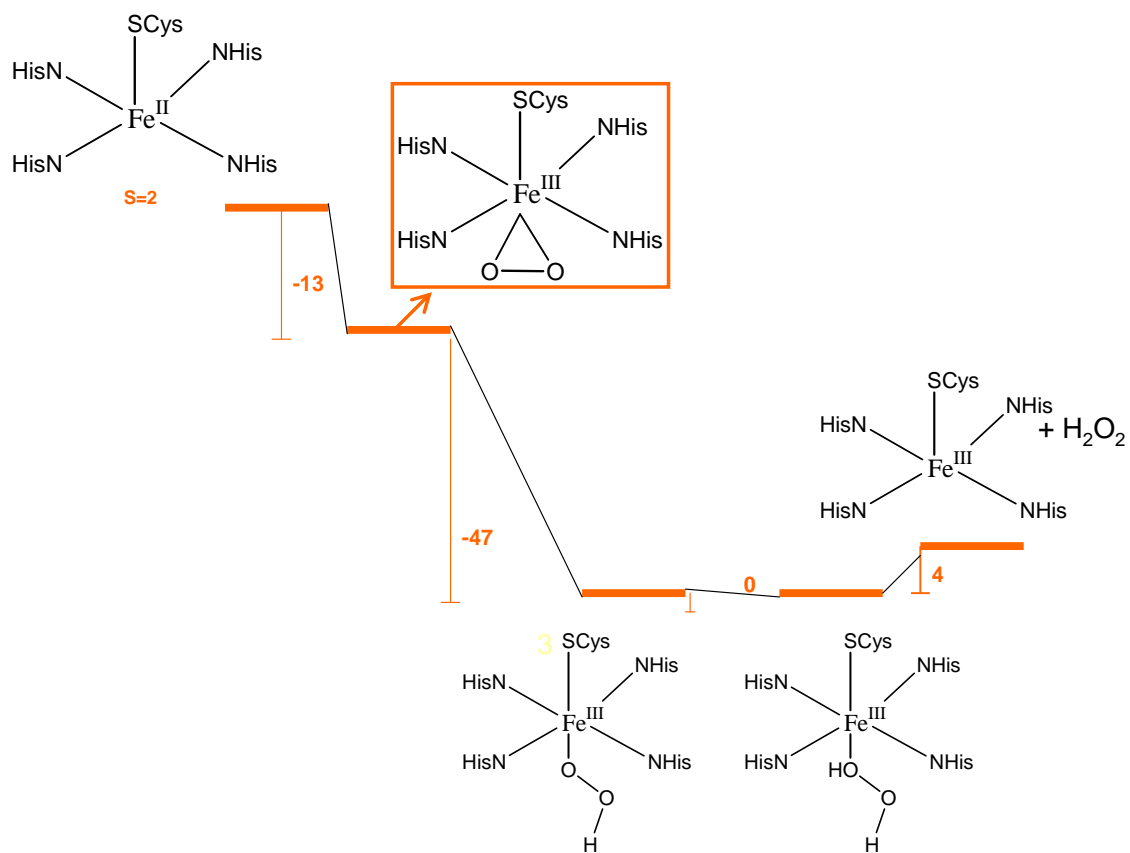

Figure S1: MO diagram with H-bonding from backbone and no solvent

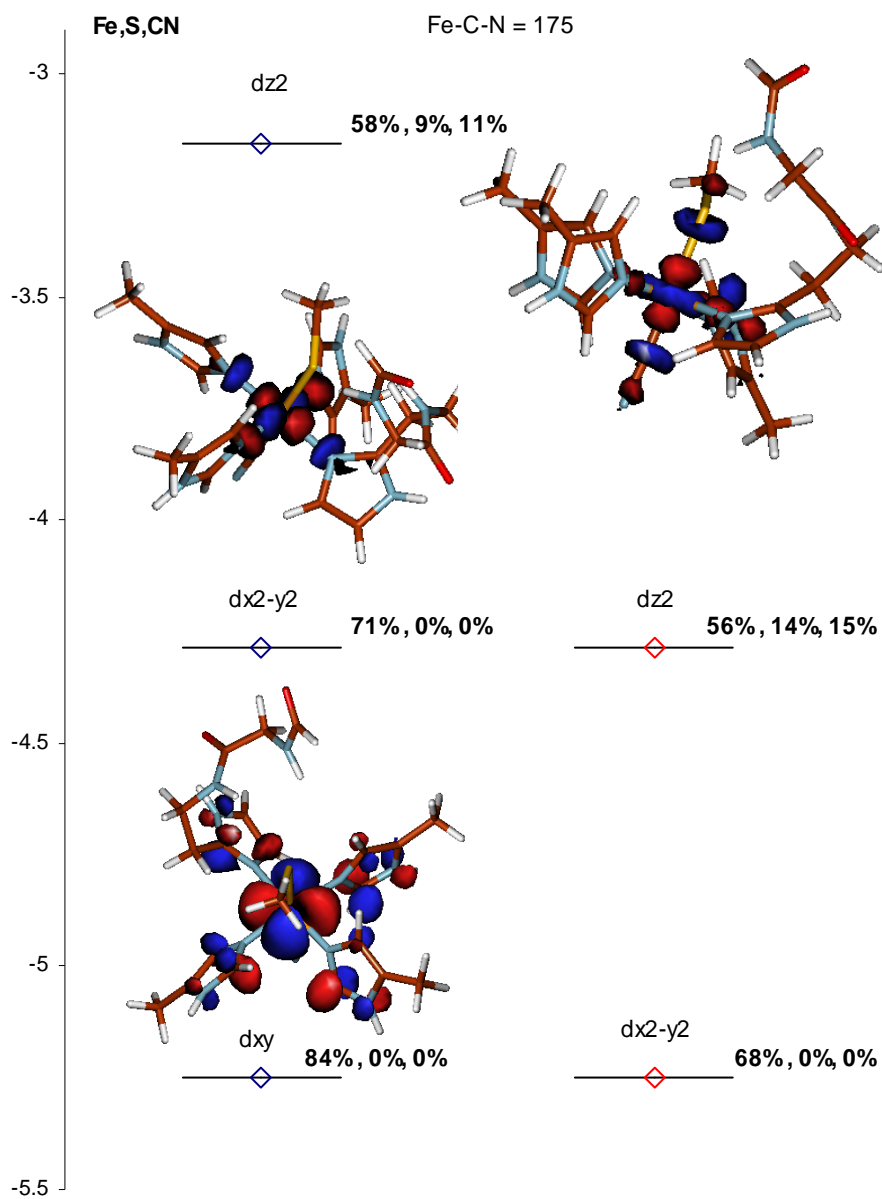

## Optimized Geometries:

### 1. Resting 6C

Fe -0.8223 -0.0864 0.1140  
N 3.8952 -1.4255 -0.7693  
C 3.2859 -2.7455 -0.8032  
C 1.7935 -2.7398 -0.3718  
C 1.5932 -2.0638 0.9541  
N 0.5819 -1.2637 1.3067  
N 2.4127 -2.2492 2.0192  
C 0.7602 -0.9610 2.6482  
C 1.9051 -1.5513 3.0955  
H 3.5741 -0.7364 -1.4382  
H 3.3604 -3.1560 -1.8158  
H 3.8856 -3.3896 -0.1545  
H 1.1899 -2.2198 -1.1140  
H 1.4370 -3.7777 -0.3200  
H 3.3599 -2.6272 1.9685  
H 0.0537 -0.3467 3.1824  
N 4.6826 1.2526 -0.9579  
C 5.1743 0.4637 0.1540  
C 4.7676 -1.0101 0.1878  
O 5.2045 -1.7189 1.0879  
H 3.7053 1.5207 -0.9956  
H 6.2659 0.5060 0.1227  
H 4.8612 0.8909 1.1147  
H 5.0519 2.5147 -2.5500  
C 5.5649 1.8841 -1.7991  
O 6.7673 1.7642 -1.7419  
C 0.3085 0.2582 -3.2193  
S 0.8898 0.5173 -1.4980  
H 1.0123 0.7435 -3.8992  
H -0.6805 0.7006 -3.3690  
H 0.2747 -0.8079 -3.4634  
C 0.1630 3.8258 1.7273  
N -0.8335 3.3693 2.5749  
C 0.4059 2.7769 0.8859  
C -1.1627 2.1076 2.2358  
N -0.4264 1.7157 1.2022  
C 0.7440 5.1921 1.7926  
H 1.1032 2.7203 0.0651  
H -1.9381 1.5261 2.7289  
N -4.2188 1.8454 -1.7680  
C -3.2770 2.8385 -1.9792  
C -3.5967 0.7786 -1.2132  
C -2.0977 2.3039 -1.5421

N -2.3074 1.0268 -1.0623  
H -5.2074 1.9167 -1.9799  
H -4.1034 -0.1296 -0.9277  
H -1.1183 2.7558 -1.5271  
N -2.6639 -3.3383 -2.0115  
C -2.5215 -3.8696 -0.7386  
C -2.0009 -2.1587 -2.0608  
C -1.7525 -2.9654 -0.0677  
N -1.4455 -1.9021 -0.8910  
H -3.1811 -3.7490 -2.7750  
H -1.9631 -1.5280 -2.9358  
H -1.4414 -2.9831 0.9637  
C -4.5696 -1.1979 1.5494  
C -3.3772 -0.3762 2.0412  
O -3.5006 0.3532 3.0164  
O -2.2672 -0.4996 1.3623  
H -4.2972 -1.8975 0.7558  
H -5.3523 -0.5162 1.1975  
H -4.9953 -1.7515 2.3920  
C -3.5955 4.1748 -2.5360  
H 2.3981 -1.5416 4.0550  
C -3.1642 -5.1149 -0.2576  
H -1.2757 3.8882 3.3200  
H 1.5033 5.3114 1.0154  
H 1.2248 5.3898 2.7586  
H -0.0167 5.9674 1.6372  
H -2.6813 4.7673 -2.6229  
H -4.2917 4.7297 -1.8948  
H -4.0445 4.1118 -3.5351  
H -2.8874 -5.2895 0.7850  
H -2.8571 -5.9961 -0.8345  
H -4.2588 -5.0556 -0.3047

## 2. Resting 5C Ferric

Fe 0.8194 0.0550 -0.1649  
N -3.6195 -1.5259 0.5554  
C -3.0965 -2.7870 0.0669  
C -1.6358 -2.6876 -0.4318  
C -1.4701 -1.7290 -1.5844  
N -0.5981 -0.6303 -1.6098  
C -2.1725 -1.7350 -2.7616  
C -0.7949 -0.0130 -2.7773  
N -1.7318 -0.6571 -3.4898  
H -0.9926 -2.3771 0.3960  
H -1.3055 -3.6928 -0.7272  
H -3.1478 -3.5301 0.8691

H -3.7512 -3.1283 -0.7394  
H -3.5047 -1.2798 1.5300  
H -2.0953 -0.3666 -4.3896  
H -2.9786 -2.3629 -3.1053  
H -0.2930 0.8799 -3.1145  
N -4.2149 0.9349 1.6870  
C -4.9316 0.5392 0.5081  
C -4.3858 -0.6971 -0.2114  
O -4.6409 -0.9056 -1.3866  
H -3.3128 1.3827 1.5905  
H -5.9608 0.3226 0.8162  
H -4.9835 1.3419 -0.2366  
C -4.8840 1.1414 2.8674  
O -6.0211 0.8139 3.0963  
H -4.2176 1.6393 3.5721  
C 0.1367 -0.7799 3.0592  
S -0.4575 0.2831 1.6849  
H -0.5038 -0.5848 3.9213  
H 1.1698 -0.5336 3.3170  
H 0.0645 -1.8364 2.7897  
C -0.7146 5.5053 -1.2152  
C -0.0123 4.1839 -1.2265  
N 1.2757 4.0219 -1.7145  
C -0.3682 2.9325 -0.7898  
C 1.6561 2.7398 -1.5562  
N 0.6793 2.0390 -0.9895  
H -1.7167 5.3938 -0.7948  
H -0.8185 5.9156 -2.2261  
H -0.1738 6.2382 -0.6057  
H 1.8408 4.7531 -2.1309  
H -1.2995 2.6224 -0.3408  
H 2.6315 2.3671 -1.8332  
C 6.3285 1.4442 0.7975  
C 4.8500 1.2907 0.9040  
N 4.0827 1.9417 1.8566  
C 3.9476 0.5497 0.1860  
C 2.7899 1.5947 1.6981  
N 2.6677 0.7439 0.6858  
H 6.7082 0.8494 -0.0365  
H 6.8360 1.1051 1.7082  
H 6.6161 2.4878 0.6242  
H 4.4380 2.5645 2.5731  
H 4.1426 -0.1235 -0.6354  
H 1.9823 1.9760 2.3063  
C 3.7950 -4.7231 0.9058  
C 2.9713 -3.6640 0.2510

N 2.4554 -3.7843 -1.0309  
C 2.5456 -2.4330 0.6748  
C 1.7555 -2.6766 -1.3365  
N 1.7858 -1.8228 -0.3170  
H 2.7437 -1.9468 1.6169  
H 1.2379 -2.5304 -2.2721  
H 2.5840 -4.5817 -1.6436  
H 4.0882 -4.4025 1.9081  
H 4.7095 -4.9311 0.3382  
H 3.2385 -5.6623 1.0037

### 3. Fe<sup>II</sup>-O<sub>2</sub><sup>-</sup>

Fe -0.8935 0.0439 0.4376  
N 3.5565 -1.5937 -0.7082  
C 3.0356 -2.8691 -0.2439  
C 1.6658 -2.7332 0.4465  
C 1.6599 -1.8039 1.6280  
N 0.7156 -0.7952 1.7778  
C 2.5053 -1.7861 2.7100  
C 0.9793 -0.1999 2.9277  
N 2.0572 -0.7651 3.5241  
H 0.9307 -2.3640 -0.2712  
H 1.3350 -3.7380 0.7479  
H 2.9363 -3.5542 -1.0958  
H 3.7845 -3.2872 0.4324  
H 2.9223 -1.0248 -1.2662  
H 2.4749 -0.4742 4.3956  
H 3.3954 -2.3521 2.9337  
H 0.4142 0.6163 3.3497  
N 4.3386 0.9293 -1.7501  
C 4.9140 0.4621 -0.5028  
C 4.5744 -0.9698 -0.0569  
O 5.2135 -1.4747 0.8570  
H 3.3257 1.0171 -1.8334  
H 5.9996 0.5198 -0.6032  
H 4.6271 1.1219 0.3272  
C 5.1114 1.2848 -2.8157  
O 6.3283 1.2680 -2.8602  
H 4.4914 1.6094 -3.6748  
C 0.2982 -0.7547 -3.0224  
S 0.7516 0.3264 -1.5999  
H 0.9980 -0.5926 -3.8475  
H -0.7100 -0.5264 -3.3899  
H 0.3287 -1.8170 -2.7544  
C 0.8614 5.5477 0.7864



C 0.1861 4.2451 1.0199  
N -1.0016 4.1154 1.7259  
C 0.4959 2.9728 0.6227  
C -1.3633 2.8063 1.7216  
N -0.4710 2.0893 1.0593  
H 1.7706 5.3920 0.1993  
H 1.1539 6.0425 1.7225  
H 0.2262 6.2493 0.2291  
H -1.5180 4.8653 2.1625  
H 1.3312 2.6418 0.0238  
H -2.2615 2.3955 2.1713  
C -6.1174 1.6385 -1.6963  
C -4.6536 1.4070 -1.5004  
N -3.6974 1.7963 -2.4298  
C -3.9342 0.8236 -0.4880  
C -2.4718 1.4459 -1.9563  
N -2.5826 0.8519 -0.7822  
H -6.6681 1.2651 -0.8287  
H -6.5034 1.1190 -2.5835  
H -6.3567 2.7044 -1.8067  
H -3.8772 2.2645 -3.3063  
H -4.2800 0.4234 0.4538  
H -1.5349 1.6333 -2.4640  
C -3.7460 -4.5919 -1.5408  
C -2.9339 -3.6610 -0.7158  
N -2.7801 -3.7890 0.6555  
C -2.2260 -2.5352 -1.0407  
C -2.0137 -2.7570 1.0967  
N -1.6624 -1.9792 0.0887  
H -2.0943 -2.0878 -2.0144  
H -1.7898 -2.5637 2.1341  
H -3.1922 -4.5052 1.2358  
H -3.7115 -4.2827 -2.5892  
H -4.8007 -4.6030 -1.2349  
H -3.3783 -5.6256 -1.4906  
O -2.0357 -0.1771 2.2538  
O -3.1108 0.5465 2.5435

4. a) High-spin Fe<sup>III</sup>-OOH

Fe -0.9758 0.0841 0.4569  
N 3.5917 -1.5976 -0.8452  
C 2.9672 -2.8620 -0.4998  
C 1.5512 -2.6911 0.0990  
C 1.5460 -1.8618 1.3555  
N 0.5940 -0.8821 1.6434

C 2.4201 -1.9330 2.4108  
C 0.8886 -0.4014 2.8426  
N 1.9865 -1.0061 3.3345  
H 0.8982 -2.2240 -0.6380  
H 1.1442 -3.6922 0.3012  
H 2.9008 -3.4934 -1.3938  
H 3.6381 -3.3619 0.2028  
H 3.1578 -1.0348 -1.5650  
H 2.4291 -0.8029 4.2204  
H 3.3278 -2.4984 2.5499  
H 0.3295 0.3560 3.3675  
N 4.3948 0.9545 -1.6936  
C 5.0168 0.3840 -0.5141  
C 4.6032 -1.0403 -0.1266  
O 5.1673 -1.5842 0.8104  
H 3.4137 1.2115 -1.6746  
H 6.0947 0.3776 -0.6906  
H 4.8362 1.0108 0.3681  
C 5.1527 1.3435 -2.7675  
O 6.3519 1.1986 -2.8551  
H 4.5398 1.8090 -3.5638  
C -0.1274 -0.4957 -2.9654  
S 0.5286 0.3361 -1.4638  
H 0.5546 -0.3025 -3.7968  
H -1.1164 -0.1097 -3.2348  
H -0.2009 -1.5772 -2.8194  
C 0.9763 5.5356 0.8588  
C 0.3288 4.2264 1.1253  
N -0.5977 4.0169 2.1341  
C 0.4403 3.0166 0.4976  
C -1.0083 2.7300 2.0835  
N -0.3950 2.0944 1.0976  
H 1.6631 5.4443 0.0136  
H 1.5564 5.8930 1.7188  
H 0.2427 6.3123 0.6087  
H -0.9217 4.7114 2.7942  
H 1.0487 2.7533 -0.3535  
H -1.7500 2.2882 2.7311  
C -6.0845 1.8316 -1.7051  
C -4.6324 1.6263 -1.4382  
N -3.6396 2.2468 -2.1809  
C -3.9525 0.8631 -0.5246  
C -2.4347 1.8487 -1.7170  
N -2.5894 1.0042 -0.7109  
H -6.6800 1.2515 -0.9955  
H -6.3627 1.5080 -2.7157

H -6.3754 2.8841 -1.5999  
H -3.7897 2.8869 -2.9496  
H -4.3427 0.2308 0.2576  
H -1.4854 2.1768 -2.1146  
C -3.8558 -4.4530 -1.6577  
C -2.9946 -3.5572 -0.8450  
N -2.5158 -3.8972 0.4095  
C -2.5104 -2.2980 -1.0714  
C -1.7875 -2.8658 0.8904  
N -1.7639 -1.8773 0.0128  
H -2.6613 -1.6683 -1.9338  
H -1.3279 -2.8502 1.8648  
H -2.6853 -4.7706 0.8904  
H -4.1090 -3.9692 -2.6046  
H -4.7960 -4.6922 -1.1452  
H -3.3567 -5.4009 -1.8944  
O -2.1350 -0.8517 2.9982  
O -2.1844 0.1619 1.9820  
H -2.9754 -0.6939 3.4574

b) Low-spin Fe<sup>III</sup>-OOH

Fe -1.0216 0.0722 0.3952  
N 3.6528 -1.6390 -0.7096  
C 3.0502 -2.8793 -0.2614  
C 1.6144 -2.6876 0.2748  
C 1.5115 -1.6701 1.3864  
N 0.5347 -0.6657 1.5157  
C 2.3461 -1.5885 2.4717  
C 0.7929 -0.0347 2.6533  
N 1.8779 -0.5564 3.2523  
H 0.9646 -2.3750 -0.5442  
H 1.2480 -3.6650 0.6189  
H 3.0219 -3.6011 -1.0866  
H 3.7129 -3.2868 0.5052  
H 3.1923 -1.1199 -1.4458  
H 2.2834 -0.2375 4.1213  
H 3.2518 -2.1245 2.7084  
H 0.2091 0.7715 3.0633  
N 4.3963 0.9009 -1.6541  
C 5.0291 0.3907 -0.4530  
C 4.6509 -1.0274 -0.0170  
O 5.2229 -1.5278 0.9389  
H 3.4072 1.1255 -1.6509  
H 6.1074 0.4085 -0.6262  
H 4.8284 1.0428 0.4064  
C 5.1530 1.2855 -2.7306

O 6.3577 1.1815 -2.7968  
H 4.5352 1.7033 -3.5488  
C -0.0801 -0.8534 -2.8508  
S 0.4690 0.2440 -1.4866  
H 0.6318 -0.7383 -3.6728  
H -1.0718 -0.5722 -3.2214  
H -0.1016 -1.9069 -2.5569  
C 0.9590 5.5482 0.8483  
C 0.2533 4.2236 0.9610  
N -0.8321 4.0450 1.8040  
C 0.4264 2.9916 0.3710  
C -1.2661 2.7693 1.7064  
N -0.5226 2.0928 0.8440  
H 1.7772 5.4768 0.1274  
H 1.3854 5.8598 1.8092  
H 0.2786 6.3371 0.5067  
H -1.2408 4.7550 2.3971  
H 1.1556 2.6958 -0.3671  
H -2.0969 2.3562 2.2564  
C -6.0778 1.7143 -1.5874  
C -4.6116 1.4853 -1.3788  
N -3.6435 2.0368 -2.2039  
C -3.8987 0.7646 -0.4531  
C -2.4213 1.6497 -1.7751  
N -2.5401 0.8710 -0.7117  
H -6.6500 1.1906 -0.8175  
H -6.4112 1.3418 -2.5635  
H -6.3343 2.7789 -1.5283  
H -3.8166 2.6309 -3.0039  
H -4.2583 0.1907 0.3853  
H -1.4845 1.9290 -2.2346  
C -3.7842 -4.5446 -1.4085  
C -2.9021 -3.5652 -0.6952  
N -2.2854 -3.8633 0.5107  
C -2.5145 -2.2769 -0.9633  
C -1.5774 -2.7914 0.9239  
N -1.6891 -1.8031 0.0498  
H -2.7772 -1.6622 -1.8083  
H -1.0321 -2.7498 1.8504  
H -2.3542 -4.7409 1.0083  
H -4.1613 -4.1031 -2.3345  
H -4.6485 -4.8287 -0.7963  
H -3.2420 -5.4604 -1.6728  
O -2.0494 -0.8270 2.8738  
O -2.1386 0.2050 1.8581  
H -2.9557 -0.8100 3.2205

5. Fe<sup>III</sup>-O<sub>2</sub>H<sub>2</sub>

Fe -0.7816 0.0186 0.1685  
N 3.8167 -1.4622 -0.5616  
C 3.2715 -2.7311 -0.1229  
C 1.7918 -2.6378 0.3087  
C 1.5700 -1.7501 1.5051  
N 0.5988 -0.7414 1.6004  
C 2.2728 -1.7689 2.6816  
C 0.7365 -0.1906 2.8081  
N 1.7308 -0.7904 3.4800  
H 1.1963 -2.2805 -0.5336  
H 1.4396 -3.6551 0.5328  
H 3.3554 -3.4558 -0.9391  
H 3.8932 -3.0925 0.7005  
H 3.7173 -1.1842 -1.5293  
H 2.0662 -0.5296 4.3994  
H 3.1375 -2.3366 2.9838  
H 0.1431 0.6147 3.2098  
N 4.5440 0.9591 -1.6864  
C 5.1343 0.5932 -0.4301  
C 4.5630 -0.6571 0.2446  
O 4.7898 -0.8923 1.4212  
H 3.6844 1.4925 -1.6900  
H 6.1982 0.4060 -0.6125  
H 5.0720 1.4066 0.3012  
C 5.3179 1.0131 -2.8185  
O 6.4331 0.5677 -2.9261  
H 4.7625 1.5119 -3.6122  
C -0.2228 -0.3410 -3.2029  
S 0.5985 0.1745 -1.6471  
H 0.3768 0.0353 -4.0339  
H -1.2340 0.0671 -3.2715  
H -0.2578 -1.4321 -3.2572  
C 0.6881 5.5672 0.5217  
C 0.1276 4.2220 0.8336  
N -0.7954 3.9974 1.8396  
C 0.3204 2.9902 0.2650  
C -1.1323 2.6916 1.8502  
N -0.4736 2.0401 0.8977  
H 1.3852 5.4984 -0.3168  
H 1.2344 5.9866 1.3746  
H -0.0993 6.2789 0.2468  
H -1.1535 4.6982 2.4780  
H 0.9697 2.7291 -0.5558  
H -1.8321 2.2641 2.5518  
C -6.0288 1.2739 -2.0474

C -4.6015 1.2772 -1.6280  
N -3.7232 2.2899 -1.9666  
C -3.8424 0.3915 -0.9057  
C -2.5054 2.0048 -1.4659  
N -2.5352 0.8512 -0.8107  
H -6.5316 0.3800 -1.6707  
H -6.1269 1.2763 -3.1393  
H -6.5671 2.1474 -1.6613  
H -3.9551 3.1098 -2.5153  
H -4.1426 -0.5627 -0.4993  
H -1.6444 2.6456 -1.5828  
C -3.4253 -4.8425 -1.5210  
C -2.7123 -3.7818 -0.7512  
N -2.3390 -3.9327 0.5756  
C -2.2909 -2.5203 -1.0819  
C -1.7310 -2.8076 0.9964  
N -1.6838 -1.9166 0.0132  
H -2.3907 -2.0122 -2.0282  
H -1.3410 -2.6692 1.9920  
H -2.4908 -4.7621 1.1377  
H -3.6102 -4.5042 -2.5432  
H -4.3928 -5.0878 -1.0676  
H -2.8367 -5.7656 -1.5767  
O -2.6498 0.5432 3.4436  
O -2.6547 -0.1570 2.1781  
H -2.9132 -0.1523 4.0729  
H -3.5003 0.1279 1.7859

6.  $\text{Fe}^{\text{III}}\text{-O}_2^-$

Fe -0.8242 0.0247 0.3210  
N 3.7155 -1.5410 -0.7850  
C 3.1298 -2.8124 -0.4085  
C 1.7257 -2.6589 0.2148  
C 1.6905 -1.7954 1.4464  
N 0.7315 -0.8049 1.6675  
C 2.5299 -1.8342 2.5304  
C 0.9958 -0.2788 2.8571  
N 2.0754 -0.8736 3.4069  
H 1.0477 -2.2298 -0.5251  
H 1.3420 -3.6636 0.4445  
H 3.0588 -3.4602 -1.2897  
H 3.8235 -3.2842 0.2910  
H 3.2893 -1.0108 -1.5335  
H 2.4988 -0.6504 4.3004  
H 3.4282 -2.4007 2.7167

H 0.4382 0.5150 3.3299  
N 4.3413 1.0601 -1.5755  
C 5.0053 0.5197 -0.4055  
C 4.6565 -0.9217 -0.0233  
O 5.1969 -1.4380 0.9422  
H 3.3446 1.2541 -1.5562  
H 6.0805 0.5655 -0.5951  
H 4.8051 1.1330 0.4816  
C 5.0641 1.4334 -2.6774  
O 6.2642 1.3113 -2.7841  
H 4.4247 1.8618 -3.4730  
C 0.2522 -0.7674 -2.9087  
S 0.6153 0.4696 -1.5907  
H 0.9751 -0.6327 -3.7169  
H -0.7500 -0.6108 -3.3216  
H 0.3228 -1.7968 -2.5444  
C 0.7795 5.5437 0.8909  
C 0.1190 4.2202 1.0608  
N -1.1023 4.0629 1.6967  
C 0.4633 2.9562 0.6622  
C -1.4503 2.7602 1.6605  
N -0.5208 2.0552 1.0340  
H 1.7264 5.4224 0.3589  
H 0.9981 6.0210 1.8541  
H 0.1578 6.2350 0.3088  
H -1.6487 4.7969 2.1260  
H 1.3385 2.6417 0.1150  
H -2.3694 2.3757 2.0769  
C -6.1773 1.5676 -1.5469  
C -4.7079 1.3413 -1.4148  
N -3.7865 1.8306 -2.3276  
C -3.9502 0.6886 -0.4769  
C -2.5440 1.4750 -1.9248  
N -2.6054 0.7779 -0.7998  
H -6.7034 1.0945 -0.7138  
H -6.5747 1.1423 -2.4767  
H -6.4272 2.6356 -1.5349  
H -4.0127 2.3562 -3.1648  
H -4.2845 0.1795 0.4137  
H -1.6311 1.7344 -2.4426  
C -3.7474 -4.6404 -1.3997  
C -2.9032 -3.6774 -0.6421  
N -2.5164 -3.8731 0.6747  
C -2.3563 -2.4707 -0.9856  
C -1.7786 -2.8166 1.0736  
N -1.6612 -1.9438 0.0869

H -2.4275 -1.9460 -1.9254  
H -1.3700 -2.7039 2.0658  
H -2.7656 -4.6616 1.2562  
H -3.9241 -4.2643 -2.4105  
H -4.7244 -4.7879 -0.9234  
H -3.2685 -5.6231 -1.4901  
O -2.0755 -0.0950 2.1705  
O -3.1491 0.3922 2.6161

7. Fe<sup>III</sup>-OH

Fe 1.1046 0.2186 0.4263  
N -3.6596 1.1512 -0.9705  
C -3.1778 2.5236 -0.9430  
C -1.7382 2.6553 -0.3762  
C -1.6054 2.0066 0.9706  
N -0.5493 1.3363 1.4366  
N -2.5576 2.0856 1.9353  
C -0.8406 1.0053 2.7507  
C -2.0928 1.4460 3.0648  
H -3.2035 0.5091 -1.6075  
H -3.1980 2.9340 -1.9581  
H -3.8924 3.1034 -0.3526  
H -1.0231 2.1853 -1.0503  
H -1.4852 3.7224 -0.3067  
H -3.5361 2.3306 1.7700  
H -0.1303 0.4711 3.3600  
N -4.1815 -1.5775 -1.2906  
C -4.8252 -0.8730 -0.2006  
C -4.5616 0.6306 -0.0978  
O -5.1354 1.2672 0.7816  
H -3.1809 -1.7432 -1.2662  
H -5.9027 -1.0128 -0.3170  
H -4.5454 -1.3014 0.7698  
H -4.3040 -2.7922 -2.9541  
C -4.9322 -2.2448 -2.2258  
O -6.1419 -2.2374 -2.2659  
C 0.2405 0.1633 -3.0429  
S -0.3969 -0.4314 -1.4253  
H -0.4107 -0.2147 -3.8345  
H 1.2553 -0.2015 -3.2331  
H 0.2431 1.2570 -3.0906  
C 0.2735 -3.7958 1.7529  
N 1.0203 -3.2752 2.7978  
C 0.0502 -2.7416 0.9167  
C 1.2311 -1.9611 2.5612  
N 0.6528 -1.6111 1.4235



C -0.0993 -5.2202 1.6217  
H -0.4736 -2.7245 -0.0260  
H 1.8229 -1.2976 3.1735  
N 4.7688 -1.7900 -0.6167  
C 3.9644 -2.4889 -1.5057  
C 4.0198 -0.8331 -0.0165  
C 2.7359 -1.8953 -1.4025  
N 2.7817 -0.8707 -0.4770  
H 5.7497 -1.9727 -0.4415  
H 4.3684 -0.1672 0.7585  
H 1.8149 -2.1501 -1.9044  
N 3.0544 3.5571 -1.4676  
C 2.5750 4.1344 -0.3037  
C 2.5484 2.3024 -1.5605  
C 1.7765 3.1825 0.2570  
N 1.7735 2.0464 -0.5240  
H 3.6636 4.0008 -2.1432  
H 2.7776 1.6205 -2.3650  
H 1.2076 3.2396 1.1716  
O 2.2283 0.6163 1.8948  
C 4.4343 -3.6414 -2.3226  
H -2.6877 1.3649 3.9612  
C 2.9470 5.4756 0.1962  
H 1.3478 -3.7904 3.6049  
H -0.6811 -5.3666 0.7081  
H -0.7113 -5.5732 2.4616  
H 0.7820 -5.8716 1.5610  
H 3.6094 -4.0227 -2.9298  
H 4.7961 -4.4664 -1.6964  
H 5.2470 -3.3619 -3.0046  
H 2.4193 5.6794 1.1313  
H 2.6873 6.2741 -0.5103  
H 4.0227 5.5535 0.3987  
H 2.3091 1.4861 2.3036

8. Fe<sup>III</sup>-OH<sub>2</sub>

Fe 0.9871 0.1703 0.2991  
N -3.6073 1.2186 -0.9606  
C -3.1071 2.5849 -0.9557  
C -1.6755 2.7182 -0.3458  
C -1.5775 1.9751 0.9583  
N -0.6064 1.1431 1.3759  
N -2.5318 2.0577 1.9132  
C -0.9803 0.7095 2.6468  
C -2.1787 1.2651 2.9808  
H -3.2780 0.5755 -1.6705

H -3.0928 2.9780 -1.9768  
H -3.8261 3.1882 -0.3948  
H -0.9328 2.3177 -1.0352  
H -1.4507 3.7820 -0.1944  
H -3.4746 2.4261 1.7640  
H -0.3920 -0.0033 3.2023  
N -4.2249 -1.4828 -1.2409  
C -4.9315 -0.7233 -0.2268  
C -4.5805 0.7566 -0.1208  
O -5.1374 1.4316 0.7350  
H -3.2799 -1.7965 -1.0580  
H -5.9989 -0.7967 -0.4535  
H -4.7881 -1.1497 0.7735  
H -4.3302 -2.8402 -2.8106  
C -4.9585 -2.1873 -2.1764  
O -6.1523 -2.0824 -2.2988  
C 0.4570 -0.5161 -3.1030  
S -0.3801 -0.4026 -1.4750  
H -0.1081 -1.2162 -3.7217  
H 1.4848 -0.8702 -3.0038  
H 0.4391 0.4639 -3.5882  
C 0.2407 -3.7903 1.8144  
N 1.2720 -3.3842 2.6429  
C -0.0693 -2.6824 1.0761  
C 1.5582 -2.0928 2.3854  
N 0.7607 -1.6298 1.4289  
C -0.2955 -5.1721 1.7847  
H -0.8187 -2.5823 0.3073  
H 2.3361 -1.5332 2.8791  
N 4.7618 -1.3786 -1.2387  
C 3.9420 -2.4777 -1.4362  
C 4.0321 -0.3860 -0.6823  
C 2.7194 -2.0853 -0.9674  
N 2.7784 -0.7809 -0.5030  
H 5.7476 -1.3299 -1.4732  
H 4.4389 0.5840 -0.4373  
H 1.8074 -2.6600 -0.9343  
N 2.7938 3.6389 -1.4649  
C 2.5969 4.1122 -0.1791  
C 2.2878 2.3891 -1.5504  
C 1.9525 3.0988 0.4704  
N 1.7772 2.0245 -0.3818  
H 3.2221 4.1561 -2.2252  
H 2.3142 1.7909 -2.4489  
H 1.5861 3.0885 1.4832  
O 2.2637 0.7257 2.2552

C 4.3816 -3.7574 -2.0528  
H -2.8061 1.1637 3.8531  
C 3.0642 5.4243 0.3215  
H 1.7291 -3.9630 3.3388  
H -1.0962 -5.2482 1.0452  
H -0.7109 -5.4729 2.7539  
H 0.4784 -5.9009 1.5154  
H 3.5420 -4.4551 -2.0957  
H 5.1848 -4.2341 -1.4783  
H 4.7468 -3.6117 -3.0763  
H 2.7548 5.5581 1.3608  
H 2.6503 6.2591 -0.2566  
H 4.1571 5.5085 0.2842  
H 3.1312 1.1540 2.2234  
H 1.7765 1.1205 2.9943

9. Fe<sup>II</sup> 5C

Fe 0.8038 0.0154 -0.1207  
N -3.5487 -1.5403 0.6346  
C -3.0113 -2.8162 0.1964  
C -1.5833 -2.7139 -0.3924  
C -1.5106 -1.7845 -1.5744  
N -0.6358 -0.7019 -1.6526  
C -2.2994 -1.7925 -2.6979  
C -0.9032 -0.0858 -2.7955  
N -1.8956 -0.7186 -3.4571  
H -0.9022 -2.3519 0.3813  
H -1.2540 -3.7249 -0.6693  
H -2.9956 -3.5083 1.0462  
H -3.7096 -3.2155 -0.5432  
H -3.1472 -1.1095 1.4583  
H -2.3129 -0.4213 -4.3285  
H -3.1420 -2.4044 -2.9761  
H -0.4124 0.8016 -3.1627  
N -4.1744 0.9820 1.6615  
C -4.8703 0.5374 0.4917  
C -4.4510 -0.8246 -0.0910  
O -4.9278 -1.2023 -1.1523  
H -3.1707 1.1380 1.6488  
H -5.9309 0.4735 0.7518  
H -4.7886 1.2577 -0.3326  
C -4.8621 1.2885 2.7959  
O -6.0578 1.1794 2.9582  
H -4.1714 1.6666 3.5486  
C 0.2327 -0.2158 3.2834  
S -0.5990 0.3428 1.7349

H -0.3433 0.1569 4.1328  
H 1.2510 0.1772 3.3549  
H 0.2669 -1.3071 3.3363  
C -0.6193 5.4660 -1.2559  
C 0.0624 4.1423 -1.3489  
N 1.2555 3.9436 -2.0257  
C -0.2447 2.9117 -0.8281  
C 1.6193 2.6441 -1.8853  
N 0.7307 1.9887 -1.1613  
H -1.5316 5.3712 -0.6615  
H -0.9044 5.8532 -2.2419  
H 0.0157 6.2182 -0.7726  
H 1.7673 4.6482 -2.5400  
H -1.0858 2.6374 -0.2092  
H 2.5279 2.2338 -2.3030  
C 6.3917 1.3946 0.8461  
C 4.9052 1.3077 0.8991  
N 4.1153 2.1323 1.6832  
C 4.0122 0.4838 0.2639  
C 2.8160 1.7917 1.4972  
N 2.7189 0.7909 0.6415  
H 6.7843 0.6427 0.1566  
H 6.8485 1.2146 1.8274  
H 6.7351 2.3765 0.4968  
H 4.4506 2.8544 2.3071  
H 4.2229 -0.3210 -0.4247  
H 1.9850 2.2868 1.9800  
C 3.8293 -4.7597 1.0024  
C 2.9920 -3.7341 0.3150  
N 2.4712 -3.9033 -0.9587  
C 2.5595 -2.4916 0.6974  
C 1.7612 -2.7974 -1.2869  
N 1.7949 -1.9166 -0.3025  
H 2.7508 -1.9734 1.6252  
H 1.2329 -2.6788 -2.2210  
H 2.5948 -4.7192 -1.5437  
H 4.1209 -4.3983 1.9916  
H 4.7468 -4.9804 0.4432  
H 3.2873 -5.7034 1.1404

10. Fe<sup>III</sup> 6C + H<sub>2</sub>O

Fe -0.8063 0.1534 -0.0372  
N 3.7821 -1.5137 -1.0345  
C 3.0416 -2.7305 -1.3278  
C 1.5400 -2.6390 -0.9405  
C 1.3513 -2.1972 0.4823

N 0.4134 -1.3681 0.9515  
N 2.0985 -2.6620 1.5148  
C 0.5616 -1.3356 2.3299  
C 1.6180 -2.1196 2.6887  
H 3.5645 -0.6836 -1.5719  
H 3.1187 -2.9559 -2.3968  
H 3.5417 -3.5436 -0.7949  
H 1.0274 -1.9297 -1.5884  
H 1.0760 -3.6235 -1.0910  
H 3.0028 -3.1263 1.4187  
H -0.1008 -0.7546 2.9508  
N 4.8502 1.0509 -0.7035  
C 5.2071 0.0240 0.2549  
C 4.6489 -1.3776 0.0046  
O 4.9692 -2.2818 0.7684  
H 3.9086 1.4273 -0.7154  
H 6.2975 -0.0491 0.2594  
H 4.8970 0.3014 1.2699  
H 5.4194 2.5327 -2.0242  
C 5.8300 1.7237 -1.3906  
O 7.0098 1.4639 -1.3264  
C 0.5028 0.9711 -3.2193  
S 1.0317 0.8413 -1.4659  
H 1.2829 1.4914 -3.7795  
H -0.4274 1.5394 -3.3092  
H 0.3698 -0.0227 -3.6576  
C 0.5051 3.5750 2.2977  
N -0.5704 3.0846 3.0206  
C 0.6757 2.6761 1.2828  
C -1.0129 1.9495 2.4454  
N -0.2754 1.6732 1.3759  
C 1.2208 4.8344 2.6297  
H 1.3996 2.6932 0.4835  
H -1.8657 1.3770 2.8025  
N -3.8966 2.7566 -1.6132  
C -2.8485 3.6618 -1.6129  
C -3.4138 1.5449 -1.2503  
C -1.7517 2.9303 -1.2530  
N -2.1138 1.6182 -1.0237  
H -4.8619 2.9735 -1.8330  
H -4.0241 0.6613 -1.1510  
H -0.7325 3.2614 -1.1298  
N -2.8772 -2.4358 -2.7743  
C -2.8479 -3.2018 -1.6188  
C -2.0941 -1.3470 -2.5874  
C -2.0204 -2.5246 -0.7728

N -1.5683 -1.3698 -1.3767  
H -3.3993 -2.6415 -3.6135  
H -1.9519 -0.5760 -3.3290  
H -1.7595 -2.7634 0.2450  
C -4.4465 -1.2338 1.8430  
C -3.0200 -0.7522 2.0605  
O -2.4741 -0.8944 3.1590  
O -2.4388 -0.2194 1.0300  
H -4.4054 -2.2934 1.5653  
H -4.9445 -0.6812 1.0425  
H -5.0159 -1.1521 2.7719  
C -3.0016 5.1038 -1.9201  
H 2.0657 -2.3386 3.6455  
C -3.6370 -4.4353 -1.3933  
H -0.9896 3.5051 3.8377  
H 2.0226 5.0086 1.9075  
H 1.6756 4.7993 3.6274  
H 0.5522 5.7039 2.6017  
H -2.0280 5.5980 -1.8727  
H -3.6648 5.6062 -1.2049  
H -3.4093 5.2730 -2.9246  
H -3.4269 -4.8257 -0.3945  
H -3.3972 -5.2255 -2.1156  
H -4.7164 -4.2484 -1.4561  
O -2.0885 -3.6778 2.3197  
H -1.8860 -4.4358 2.8826  
H -2.1261 -2.8973 2.9002

11. Fe<sup>III</sup>-OOH + H<sub>2</sub>O

Fe -0.8257 0.1659 0.3727  
N 3.6953 -1.7253 -0.7974  
C 2.9906 -2.9629 -0.5150  
C 1.5623 -2.7319 0.0321  
C 1.5496 -1.9387 1.3117  
N 0.6402 -0.9170 1.5909  
C 2.3745 -2.0867 2.3982  
C 0.9104 -0.4866 2.8147  
N 1.9533 -1.1636 3.3313  
H 0.9660 -2.2096 -0.7158  
H 1.0945 -3.7145 0.1880  
H 2.9275 -3.5647 -1.4294  
H 3.6044 -3.5180 0.1983  
H 3.3220 -1.1200 -1.5166  
H 2.3693 -1.0095 4.2398  
H 3.2443 -2.7044 2.5561  
H 0.3713 0.2853 3.3395

N 4.6676 0.8018 -1.5365  
C 5.2092 0.1657 -0.3509  
C 4.7047 -1.2441 -0.0229  
O 5.1999 -1.8438 0.9190  
H 3.7016 1.1112 -1.5486  
H 6.2916 0.1055 -0.4847  
H 5.0261 0.7767 0.5419  
C 5.4887 1.1786 -2.5674  
O 6.6810 0.9711 -2.6117  
H 4.9347 1.6988 -3.3730  
C 0.1307 -0.3640 -3.0292  
S 0.7747 0.3739 -1.4723  
H 0.8556 -0.1852 -3.8268  
H -0.8244 0.0826 -3.3259  
H -0.0063 -1.4435 -2.9187  
C 1.3960 5.4896 1.0147  
C 0.6692 4.2108 1.2160  
N -0.3079 4.0241 2.1806  
C 0.7418 3.0146 0.5572  
C -0.7841 2.7634 2.0752  
N -0.1655 2.1230 1.0958  
H 2.1111 5.3846 0.1950  
H 1.9584 5.7909 1.9073  
H 0.7157 6.3118 0.7591  
H -0.6213 4.7166 2.8479  
H 1.3698 2.7423 -0.2766  
H -1.5743 2.3448 2.6794  
C -5.7407 2.2484 -1.9366  
C -4.3139 1.9570 -1.6187  
N -3.2597 2.5429 -2.3026  
C -3.7138 1.1328 -0.7021  
C -2.0978 2.0670 -1.8034  
N -2.3386 1.2046 -0.8300  
H -6.3950 1.6821 -1.2688  
H -5.9940 1.9687 -2.9666  
H -5.9792 3.3119 -1.8115  
H -3.3437 3.2113 -3.0571  
H -4.1690 0.5012 0.0447  
H -1.1168 2.3538 -2.1531  
C -3.8540 -4.1471 -1.9893  
C -2.9805 -3.3225 -1.1167  
N -2.5725 -3.7228 0.1451  
C -2.4210 -2.0857 -1.2859  
C -1.8107 -2.7464 0.6851  
N -1.6983 -1.7366 -0.1609  
H -2.5025 -1.4250 -2.1343

H -1.3914 -2.7829 1.6770  
H -2.8080 -4.5987 0.5925  
H -4.0419 -3.6241 -2.9306  
H -4.8260 -4.3489 -1.5218  
H -3.3969 -5.1139 -2.2343  
O -2.4074 -0.8471 2.7215  
O -1.9863 0.3039 1.9563  
H -2.5789 -0.4428 3.5872  
O -4.8542 -1.2356 1.2962  
H -4.0448 -1.1685 1.8390  
H -5.6049 -1.1729 1.9018

12. Fe<sup>III</sup>-O<sub>2</sub>H<sub>2</sub> + H<sub>2</sub>O

Fe -0.6286 0.0477 0.0589  
N 3.9734 -1.5101 -0.4554  
C 3.3818 -2.7760 -0.0715  
C 1.8832 -2.6614 0.2828  
C 1.6145 -1.7921 1.4831  
N 0.6588 -0.7663 1.5467  
C 2.2530 -1.8470 2.6946  
C 0.7421 -0.2412 2.7707  
N 1.6876 -0.8731 3.4824  
H 1.3404 -2.2766 -0.5827  
H 1.5004 -3.6756 0.4677  
H 3.4955 -3.4867 -0.8963  
H 3.9517 -3.1650 0.7764  
H 3.9311 -1.2121 -1.4213  
H 1.9782 -0.6363 4.4233  
H 3.0894 -2.4373 3.0310  
H 0.1433 0.5681 3.1562  
N 4.8052 0.9170 -1.4918  
C 5.3206 0.5159 -0.2134  
C 4.6906 -0.7353 0.4051  
O 4.8498 -0.9970 1.5872  
H 3.9573 1.4673 -1.5304  
H 6.3890 0.3111 -0.3428  
H 5.2346 1.3165 0.5295  
C 5.6394 0.9769 -2.5799  
O 6.7502 0.5115 -2.6370  
H 5.1367 1.5014 -3.3920  
C 0.1027 -0.2595 -3.2846  
S 0.8517 0.2106 -1.6785  
H 0.7528 0.1203 -4.0749  
H -0.8956 0.1698 -3.3986  
H 0.0501 -1.3485 -3.3622  
C 0.9243 5.5584 0.5995



C 0.3227 4.2190 0.8545  
N -0.6568 3.9939 1.8054  
C 0.5224 2.9945 0.2726  
C -1.0183 2.6951 1.7723  
N -0.3220 2.0486 0.8433  
H 1.6638 5.4916 -0.2020  
H 1.4320 5.9508 1.4883  
H 0.1662 6.2906 0.2974  
H -1.0353 4.6895 2.4377  
H 1.2096 2.7360 -0.5176  
H -1.7625 2.2684 2.4271  
C -5.7254 1.4483 -2.4070  
C -4.3227 1.4154 -1.9124  
N -3.4087 2.4166 -2.1838  
C -3.6201 0.5014 -1.1686  
C -2.2249 2.0981 -1.6250  
N -2.3114 0.9332 -0.9953  
H -6.2643 0.5576 -2.0753  
H -5.7649 1.4732 -3.5023  
H -6.2670 2.3249 -2.0327  
H -3.5954 3.2511 -2.7277  
H -3.9595 -0.4541 -0.7977  
H -1.3470 2.7237 -1.6833  
C -3.2693 -4.7274 -1.8645  
C -2.5786 -3.6957 -1.0371  
N -2.2796 -3.8789 0.3044  
C -2.1165 -2.4368 -1.3199  
C -1.6739 -2.7742 0.7791  
N -1.5575 -1.8660 -0.1824  
H -2.1560 -1.9091 -2.2599  
H -1.3351 -2.6623 1.7965  
H -2.4768 -4.7155 0.8411  
H -3.3929 -4.3663 -2.8882  
H -4.2641 -4.9619 -1.4680  
H -2.6960 -5.6608 -1.9072  
O -2.4553 0.5129 3.3550  
O -2.4626 -0.2360 2.1162  
H -2.4577 -0.1873 4.0303  
H -3.4362 -0.2615 1.9107  
O -5.1218 -0.3632 1.7637  
H -5.6405 0.4528 1.7930  
H -5.6482 -1.0464 2.2022

13. Fe<sup>III</sup>-CN

Fe 1.1000 0.1838 0.3024  
N -3.7474 1.2714 -0.8673

C -3.2353 2.6291 -0.7944  
C -1.7563 2.6971 -0.3295  
C -1.5067 1.8801 0.9174  
N -0.4528 1.1168 1.2836  
N -2.3823 1.9402 1.9521  
C -0.6841 0.7379 2.6024  
C -1.8884 1.2189 3.0147  
H -3.3177 0.6355 -1.5280  
H -3.3134 3.1095 -1.7756  
H -3.8957 3.1786 -0.1187  
H -1.1007 2.3216 -1.1159  
H -1.4880 3.7448 -0.1378  
H -3.3494 2.2535 1.8620  
H 0.0337 0.1603 3.1564  
N -4.3019 -1.4516 -1.1699  
C -4.9031 -0.7447 -0.0568  
C -4.6191 0.7517 0.0386  
O -5.1464 1.3981 0.9462  
H -3.3039 -1.6320 -1.1769  
H -5.9846 -0.8763 -0.1418  
H -4.5996 -1.1771 0.9051  
H -4.5172 -2.6959 -2.8059  
C -5.1020 -2.1356 -2.0526  
O -6.3173 -2.1229 -2.0227  
C 0.1528 -0.0671 -3.1270  
S -0.4789 -0.4066 -1.4362  
H -0.5123 -0.5667 -3.8366  
H 1.1624 -0.4648 -3.2807  
H 0.1448 1.0022 -3.3625  
C 0.2459 -3.7678 1.6877  
N 1.1326 -3.2681 2.6284  
C 0.0177 -2.7174 0.8355  
C 1.4175 -1.9862 2.3331  
N 0.7542 -1.6083 1.2397  
C -0.2270 -5.1857 1.7258  
H -0.5998 -2.6757 -0.0473  
H 2.1001 -1.3722 2.8989  
N 4.6191 -1.6595 -0.9823  
C 3.7491 -2.5230 -1.6405  
C 3.9105 -0.6751 -0.3876  
C 2.5065 -1.9835 -1.4141  
N 2.6133 -0.8351 -0.6308  
H 5.6252 -1.7550 -0.9360  
H 4.3406 0.0931 0.2365  
H 1.5398 -2.3386 -1.7349  
N 2.6589 3.5391 -1.6233

C 2.4986 4.0727 -0.3499  
C 2.1497 2.2848 -1.6456  
C 1.8727 3.0831 0.3577  
N 1.6649 1.9704 -0.4512  
H 3.0811 4.0083 -2.4135  
H 2.1610 1.6460 -2.5135  
H 1.5994 3.0771 1.3992  
N 3.1067 0.8419 2.5916  
C 2.3244 0.6157 1.7522  
C 4.2202 -3.7567 -2.3710  
H -2.4245 1.1206 3.9454  
C 3.0029 5.4222 0.0668  
H 1.5101 -3.7774 3.4167  
H -0.9100 -5.3777 0.8945  
H -0.7633 -5.4104 2.6556  
H 0.6095 -5.8899 1.6410  
H 3.3639 -4.2784 -2.8048  
H 4.7323 -4.4499 -1.6935  
H 4.9097 -3.5056 -3.1853  
H 2.7662 5.5907 1.1199  
H 2.5462 6.2305 -0.5166  
H 4.0909 5.4950 -0.0476

14. Fe<sup>III</sup>-CN +H<sub>2</sub>O

Fe 0.9243 0.1768 0.1830  
N -3.9768 1.2768 -0.7211  
C -3.4576 2.6331 -0.6788  
C -1.9551 2.6975 -0.2958  
C -1.6399 1.8818 0.9370  
N -0.5697 1.1159 1.2462  
N -2.4572 1.9461 2.0181  
C -0.7294 0.7399 2.5764  
C -1.9079 1.2251 3.0533  
H -3.5858 0.6385 -1.4032  
H -3.5880 3.1121 -1.6551  
H -4.0784 3.1856 0.0312  
H -1.3447 2.3188 -1.1163  
H -1.6737 3.7447 -0.1209  
H -3.4269 2.2621 1.9806  
H 0.0161 0.1610 3.0912  
N -4.5548 -1.4451 -0.9880  
C -5.0921 -0.7346 0.1552  
C -4.7990 0.7611 0.2322  
O -5.2739 1.4105 1.1662  
H -3.5592 -1.6284 -1.0493  
H -6.1770 -0.8631 0.1298

H -4.7375 -1.1663 1.0998  
H -4.8631 -2.6914 -2.6075  
C -5.4041 -2.1281 -1.8242  
O -6.6159 -2.1118 -1.7278  
C -0.2102 -0.0769 -3.1888  
S -0.7050 -0.3813 -1.4396  
H -0.9146 -0.5757 -3.8600  
H 0.7883 -0.4778 -3.3969  
H -0.2281 0.9920 -3.4254  
C 0.1362 -3.7700 1.6201  
N 1.0746 -3.2714 2.5099  
C -0.1354 -2.7204 0.7798  
C 1.3465 -1.9909 2.1971  
N 0.6253 -1.6128 1.1411  
C -0.3380 -5.1865 1.6866  
H -0.8003 -2.6783 -0.0679  
H 2.0609 -1.3780 2.7236  
N 4.3624 -1.6790 -1.2894  
C 3.4552 -2.5410 -1.8974  
C 3.6903 -0.6915 -0.6585  
C 2.2284 -1.9975 -1.6041  
N 2.3813 -0.8481 -0.8299  
H 5.3693 -1.7774 -1.2982  
H 4.1562 0.0764 -0.0603  
H 1.2445 -2.3502 -1.8708  
N 2.3849 3.5243 -1.8312  
C 2.2962 4.0605 -0.5519  
C 1.8716 2.2715 -1.8233  
C 1.7072 3.0739 0.1907  
N 1.4522 1.9605 -0.6036  
H 2.7644 3.9910 -2.6442  
H 1.8335 1.6313 -2.6894  
H 1.4914 3.0704 1.2457  
N 3.0388 0.8671 2.3951  
C 2.2035 0.6453 1.6059  
C 3.8820 -3.7773 -2.6504  
H -2.3924 1.1299 4.0121  
C 2.8264 5.4091 -0.1659  
H 1.4933 -3.7806 3.2772  
H -1.0661 -5.3778 0.8943  
H -0.8231 -5.4081 2.6448  
H 0.4906 -5.8933 1.5573  
H 3.0017 -4.2971 -3.0357  
H 4.4285 -4.4709 -2.0008  
H 4.5265 -3.5295 -3.5017  
H 2.6483 5.5800 0.8983

H 2.3407 6.2178 -0.7248  
H 3.9067 5.4785 -0.3399  
O 5.7170 -0.0569 1.5795  
H 6.3217 0.5257 2.0621  
H 4.8308 0.2525 1.8495

15. SOD Fe<sup>III</sup> 5C

O -0.366581 -2.470108 -0.721809  
Fe -0.114181 -0.740302 -0.171826  
C 5.603334 -0.188878 -0.906453  
C 4.173550 -0.625477 -0.923485  
N 3.759394 -1.871535 -1.374670  
C 3.018024 -0.002448 -0.534725  
C 2.420896 -1.966748 -1.245946  
N 1.933134 -0.841872 -0.737724  
H 5.675779 0.826215 -0.508255  
H 6.040265 -0.185894 -1.912273  
H 6.218356 -0.840774 -0.274557  
H 2.898838 0.987970 -0.125709  
H 1.823558 -2.830387 -1.499475  
H 4.362086 -2.600590 -1.734146  
C -1.151429 -1.610902 3.823718  
C -0.907415 -1.978996 2.375327  
O -1.174315 -3.069730 1.899190  
O -0.381052 -0.978619 1.689802  
H -1.567549 -2.458680 4.370582  
H -1.846331 -0.765558 3.876247  
H -0.211159 -1.299354 4.291054  
C -5.293884 1.548062 -1.273134  
C -4.048125 0.720856 -1.255054  
N -3.986698 -0.560669 -1.785660  
C -2.791349 0.944128 -0.756407  
C -2.751306 -1.062130 -1.591593  
N -1.993769 -0.170297 -0.966171  
H -5.103347 2.517856 -0.806833  
H -6.106787 1.063992 -0.718777  
H -5.645457 1.731904 -2.295405  
H -2.411721 1.820766 -0.255308  
H -2.424753 -2.051364 -1.876228  
H -4.749877 -1.050832 -2.234290  
C 1.503031 4.880168 0.242316  
C 0.986935 3.506863 0.480477  
N 0.737279 3.010511 1.748877  
C 0.678500 2.471130 -0.362672  
C 0.307877 1.735131 1.642100  
N 0.264042 1.372219 0.369940

|   |           |           |           |
|---|-----------|-----------|-----------|
| H | 1.626322  | 5.054429  | -0.829642 |
| H | 2.478522  | 5.036193  | 0.719112  |
| H | 0.819161  | 5.647250  | 0.625837  |
| H | 0.736838  | 2.446733  | -1.441363 |
| H | 0.053770  | 1.094829  | 2.471941  |
| H | 0.855760  | 3.519107  | 2.615507  |
| H | -0.663490 | -3.061364 | 0.003024  |

#### 16. SOD Fe<sup>II</sup> 5C

|    |           |           |           |
|----|-----------|-----------|-----------|
| O  | -0.370260 | -2.772000 | -0.683259 |
| Fe | -0.053034 | -0.602592 | -0.259331 |
| C  | 5.616758  | -0.105315 | -0.941684 |
| C  | 4.203541  | -0.596141 | -0.976237 |
| N  | 3.857889  | -1.924523 | -1.180678 |
| C  | 3.004212  | 0.043587  | -0.809782 |
| C  | 2.513133  | -2.042182 | -1.125893 |
| N  | 1.956227  | -0.861540 | -0.899986 |
| H  | 5.629002  | 0.971433  | -0.754487 |
| H  | 6.135405  | -0.285419 | -1.891059 |
| H  | 6.194371  | -0.590416 | -0.145662 |
| H  | 2.829494  | 1.090992  | -0.620689 |
| H  | 1.973308  | -2.972250 | -1.222752 |
| H  | 4.504731  | -2.687395 | -1.332660 |
| C  | -1.138695 | -1.644244 | 3.750762  |
| C  | -0.885751 | -1.954413 | 2.291050  |
| O  | -1.280673 | -3.014476 | 1.770055  |
| O  | -0.262985 | -1.027570 | 1.652183  |
| H  | -1.598137 | -2.491838 | 4.262457  |
| H  | -1.800697 | -0.773885 | 3.825077  |
| H  | -0.195785 | -1.383976 | 4.242389  |
| C  | -5.267222 | 1.728523  | -1.218805 |
| C  | -4.117223 | 0.798592  | -0.989151 |
| N  | -4.282953 | -0.486522 | -0.497300 |
| C  | -2.760075 | 0.925881  | -1.150566 |
| C  | -3.070865 | -1.071516 | -0.379848 |
| N  | -2.115241 | -0.240076 | -0.767210 |
| H  | -4.901453 | 2.687763  | -1.594514 |
| H  | -5.821350 | 1.921008  | -0.292505 |
| H  | -5.972358 | 1.328130  | -1.956809 |
| H  | -2.209128 | 1.788289  | -1.495316 |
| H  | -2.923711 | -2.059399 | 0.032814  |
| H  | -5.165389 | -0.915712 | -0.251320 |
| C  | 1.558987  | 4.950814  | 0.398998  |
| C  | 1.059669  | 3.565681  | 0.584433  |
| N  | 0.877489  | 2.991888  | 1.827992  |
| C  | 0.709097  | 2.583331  | -0.305550 |

|   |           |           |           |
|---|-----------|-----------|-----------|
| C | 0.445625  | 1.720525  | 1.659689  |
| N | 0.337024  | 1.438374  | 0.373813  |
| H | 1.621949  | 5.187965  | -0.666243 |
| H | 2.559279  | 5.085359  | 0.828353  |
| H | 0.897256  | 5.692241  | 0.863590  |
| H | 0.712739  | 2.633153  | -1.385631 |
| H | 0.233950  | 1.028406  | 2.459413  |
| H | 1.035312  | 3.446597  | 2.717499  |
| H | -0.950503 | -3.150879 | -1.357016 |
| H | -0.693064 | -3.078035 | 0.224432  |

17. SOD Fe<sup>III</sup> – O<sub>2</sub><sup>-</sup>

|    |           |           |           |
|----|-----------|-----------|-----------|
| O  | 1.182635  | 0.333019  | -2.348741 |
| Fe | 0.358726  | 0.039752  | -0.708952 |
| O  | -0.235830 | -1.961406 | -0.536713 |
| O  | 0.501216  | -2.586922 | -1.409697 |
| C  | -5.239915 | -0.356366 | -2.091653 |
| C  | -3.777482 | -0.080303 | -2.107256 |
| N  | -3.023663 | 0.062132  | -3.264042 |
| C  | -2.874868 | 0.051492  | -1.088630 |
| C  | -1.728320 | 0.258584  | -2.910021 |
| N  | -1.613297 | 0.259361  | -1.597961 |
| H  | -5.586961 | -0.431403 | -1.057411 |
| H  | -5.485928 | -1.302272 | -2.591984 |
| H  | -5.822108 | 0.436759  | -2.579660 |
| H  | -3.049972 | -0.014277 | -0.026126 |
| H  | -0.893492 | 0.363524  | -3.588795 |
| H  | -3.370476 | 0.006278  | -4.211046 |
| C  | 1.362085  | 4.141634  | 0.399347  |
| C  | 1.257587  | 2.931843  | -0.530814 |
| O  | 1.834968  | 2.940759  | -1.620662 |
| O  | 0.538361  | 1.971938  | -0.048824 |
| H  | 1.972254  | 4.927632  | -0.051219 |
| H  | 1.806276  | 3.836219  | 1.353984  |
| H  | 0.361590  | 4.535504  | 0.613909  |
| C  | 4.570085  | -1.982366 | 2.706347  |
| C  | 3.764870  | -1.441773 | 1.577791  |
| N  | 4.211283  | -1.395962 | 0.264013  |
| C  | 2.502077  | -0.917158 | 1.532414  |
| C  | 3.229054  | -0.865633 | -0.505420 |
| N  | 2.186961  | -0.565235 | 0.240732  |
| H  | 3.996995  | -1.908796 | 3.634767  |
| H  | 5.507915  | -1.429807 | 2.851751  |
| H  | 4.828444  | -3.039580 | 2.560648  |
| H  | 1.797674  | -0.779739 | 2.338592  |
| H  | 3.268807  | -0.719178 | -1.575350 |

|   |           |           |           |
|---|-----------|-----------|-----------|
| H | 5.108762  | -1.716787 | -0.070249 |
| C | -2.997915 | -1.294366 | 4.066347  |
| C | -2.101412 | -0.612806 | 3.087216  |
| N | -1.789035 | 0.738184  | 3.160341  |
| C | -1.433177 | -1.060332 | 1.975375  |
| C | -0.973219 | 1.046256  | 2.118198  |
| N | -0.742453 | -0.020473 | 1.381987  |
| H | -3.097106 | -2.350603 | 3.801466  |
| H | -4.005936 | -0.858911 | 4.076541  |
| H | -2.607016 | -1.245702 | 5.091384  |
| H | -1.404111 | -2.050470 | 1.544371  |
| H | -0.578252 | 2.027066  | 1.900719  |
| H | -2.112679 | 1.384663  | 3.866007  |
| H | 1.502367  | 1.258957  | -2.403359 |

#### 18. SOD Fe<sup>III</sup>-OH<sub>2</sub>

|    |         |         |         |
|----|---------|---------|---------|
| O  | -0.3575 | -2.4826 | -0.7268 |
| Fe | -0.0864 | -0.7329 | -0.1786 |
| C  | 5.6033  | -0.1889 | -0.9065 |
| C  | 4.2103  | -0.6984 | -0.7886 |
| N  | 3.7928  | -1.9572 | -1.1986 |
| C  | 3.0792  | -0.1060 | -0.2970 |
| C  | 2.4741  | -2.0851 | -0.9483 |
| N  | 2.0104  | -0.9708 | -0.4065 |
| H  | 5.6532  | 0.8343  | -0.5259 |
| H  | 5.9499  | -0.1752 | -1.9473 |
| H  | 6.3123  | -0.7940 | -0.3284 |
| H  | 2.9675  | 0.8845  | 0.1150  |
| H  | 1.8702  | -2.9552 | -1.1636 |
| H  | 4.3486  | -2.6745 | -1.6379 |
| C  | -1.1514 | -1.6109 | 3.8237  |
| C  | -0.9006 | -1.9713 | 2.3744  |
| O  | -1.1748 | -3.0623 | 1.8952  |
| O  | -0.3667 | -0.9756 | 1.7011  |
| H  | -1.5691 | -2.4599 | 4.3679  |
| H  | -1.8478 | -0.7666 | 3.8768  |
| H  | -0.2138 | -1.2987 | 4.2959  |
| C  | -5.2939 | 1.5481  | -1.2731 |
| C  | -4.0977 | 0.6706  | -1.1533 |
| N  | -4.0448 | -0.6408 | -1.6044 |
| C  | -2.8596 | 0.8970  | -0.6134 |
| C  | -2.8296 | -1.1522 | -1.3275 |
| N  | -2.0838 | -0.2379 | -0.7292 |
| H  | -5.0711 | 2.5338  | -0.8569 |
| H  | -6.1541 | 1.1424  | -0.7268 |
| H  | -5.5988 | 1.6880  | -2.3175 |



H -2.4797 1.7955 -0.1522  
H -2.5023 -2.1577 -1.5495  
H -4.7722 -1.1573 -2.0740  
C 1.5030 4.8802 0.2423  
C 0.9871 3.5091 0.4914  
N 0.6844 3.0392 1.7591  
C 0.7216 2.4544 -0.3424  
C 0.2658 1.7584 1.6594  
N 0.2792 1.3715 0.3948  
H 1.6718 5.0282 -0.8275  
H 2.4556 5.0582 0.7566  
H 0.7978 5.6517 0.5755  
H 0.8256 2.3948 -1.4154  
H -0.0187 1.1312 2.4896  
H 0.7650 3.5654 2.6193  
H -0.6448 -3.0465 0.0245  
O 0.2030 -0.0535 -2.3738  
H 0.8571 -0.5794 -2.8547  
H -0.6240 -0.0804 -2.8747

19. non H-bonded Fe<sup>III</sup> 6C S=5/2

Fe 0.2078 -0.1606 -0.2154  
C -0.3403 -3.3733 -2.0315  
C 0.4983 -3.3976 -0.7910  
N 0.7405 -2.2671 0.0222  
C 1.1590 -4.4800 -0.2325  
C 1.5231 -2.6713 1.0429  
N 1.7997 -4.0033 0.9154  
H -0.5403 -4.3957 -2.3709  
H 0.1686 -2.8355 -2.8394  
H -1.2985 -2.8737 -1.8583  
H 1.2223 -5.5066 -0.5533  
H 1.8519 -2.0566 1.8700  
H 2.3653 -4.5469 1.5545  
C -1.2366 -0.0341 -3.4484  
S 0.4575 -0.1235 -2.6311  
H -1.0972 -0.1697 -4.5238  
H -1.6869 0.9467 -3.2665  
H -1.8908 -0.8158 -3.0581  
C 5.4728 2.0861 -1.1745  
C 4.2703 1.4546 -0.5482  
N 4.1527 1.2015 0.8279  
C 3.0815 1.0106 -1.0945  
C 2.9316 0.6315 1.0757  
N 2.2537 0.5026 -0.0787  
H 5.3287 2.1699 -2.2557

H 6.3815 1.4926 -1.0075  
H 5.6553 3.0960 -0.7833  
H 2.7790 1.0127 -2.1279  
H 2.5856 0.3125 2.0503  
H 4.8537 1.4029 1.5301  
C -2.3565 4.8231 1.1388  
C -1.5510 3.7821 0.4329  
N -0.9257 3.9924 -0.8074  
C -1.2611 2.4713 0.7626  
C -0.3012 2.8300 -1.1866  
N -0.4918 1.8891 -0.2515  
H -2.7420 4.4200 2.0798  
H -3.2175 5.1513 0.5410  
H -1.7599 5.7127 1.3812  
H -1.5376 1.9094 1.6370  
H 0.2594 2.7002 -2.0977  
H -0.9275 4.8590 -1.3308  
C -5.6330 -0.2846 -0.3602  
C -4.1914 -0.6413 -0.1816  
N -3.7492 -1.7596 0.5423  
C -3.0343 -0.0295 -0.6281  
C -2.3769 -1.7864 0.5145  
N -1.9127 -0.7489 -0.1933  
H -5.7193 0.6303 -0.9536  
H -6.1329 -0.1055 0.6010  
H -6.1890 -1.0727 -0.8851  
H -2.9424 0.8732 -1.2052  
H -1.7730 -2.5304 1.0050  
H -4.3432 -2.4355 1.0065  
C -0.8397 0.0046 4.0309  
C 0.2822 -0.2779 3.0450  
O 1.4195 -0.6934 3.4335  
O -0.0053 -0.0345 1.7784  
H -1.8086 -0.2793 3.6067  
H -0.8673 1.0811 4.2492  
H -0.6645 -0.5266 4.9699

20. non H-bonded Fe<sup>III</sup> 6C S=1/2

Fe -0.0691 -0.0813 -0.0879  
C 0.3627 -3.5097 1.3109  
C -0.5418 -3.2207 0.1572  
N -0.7820 -1.9620 -0.4059  
C -1.2969 -4.1408 -0.5219  
C -1.6555 -2.1433 -1.3927  
N -1.9908 -3.4445 -1.4905  
H 0.4801 -4.5920 1.4224

H -0.0471 -3.0986 2.2378  
H 1.3533 -3.0675 1.1692  
H -1.3976 -5.2069 -0.3912  
H -2.0064 -1.3633 -2.0530  
H -2.6386 -3.8338 -2.1604  
C 1.0461 -0.6004 3.4859  
S -0.3407 -0.3165 2.2746  
H 0.5646 -0.7346 4.4573  
H 1.7225 0.2590 3.5478  
H 1.6273 -1.4969 3.2505  
C -5.6592 0.7607 0.7858  
C -4.2080 0.8546 0.3977  
N -3.7052 1.9266 -0.3293  
C -3.1154 0.0485 0.6074  
C -2.3815 1.7417 -0.5322  
N -1.9839 0.6063 0.0205  
H -5.8332 -0.1576 1.3520  
H -6.3124 0.7426 -0.0948  
H -5.9630 1.6043 1.4168  
H -3.0529 -0.8726 1.1653  
H -1.7614 2.4136 -1.1015  
H -4.2414 2.7132 -0.6683  
C 2.1507 5.0132 -1.0253  
C 1.5249 3.8149 -0.3851  
N 1.0985 3.7989 0.9350  
C 1.2273 2.5627 -0.8581  
C 0.5737 2.5825 1.2150  
N 0.6376 1.8057 0.1432  
H 2.3923 4.7930 -2.0681  
H 3.0806 5.3050 -0.5221  
H 1.4783 5.8797 -1.0137  
H 1.3741 2.1444 -1.8404  
H 0.1562 2.2829 2.1651  
H 1.1676 4.5656 1.5903  
C 5.5617 -1.0813 0.2190  
C 4.0954 -1.0412 -0.1187  
N 3.5777 -1.6844 -1.2342  
C 3.0001 -0.4485 0.4654  
C 2.2432 -1.4673 -1.2918  
N 1.8535 -0.7185 -0.2711  
H 5.7499 -0.5101 1.1314  
H 6.1698 -0.6448 -0.5821  
H 5.9088 -2.1074 0.3886  
H 2.9590 0.1541 1.3589  
H 1.6009 -1.8313 -2.0765  
H 4.1091 -2.2249 -1.9030

O -1.1859 0.4424 -2.7061  
H -0.8243 0.4148 -3.6088  
O 0.0523 0.1824 -1.9641

21. non H-bonded Fe<sup>III</sup>-OOH S=5/2

Fe -0.1865 -0.1626 -0.1244  
C 0.4893 -3.5866 1.3065  
C -0.4705 -3.4727 0.1686  
N -0.7765 -2.2718 -0.4678  
C -1.2007 -4.4729 -0.4186  
C -1.6692 -2.5541 -1.4074  
N -1.9545 -3.8727 -1.4096  
H 0.6137 -4.6359 1.5903  
H 0.1224 -3.0279 2.1732  
H 1.4726 -3.1819 1.0458  
H -1.2519 -5.5317 -0.2174  
H -2.0936 -1.8369 -2.0906  
H -2.6065 -4.3353 -2.0272  
C 1.0164 -0.4064 3.3724  
S -0.4557 -0.2897 2.2792  
H 0.6618 -0.5849 4.3904  
H 1.5861 0.5293 3.3693  
H 1.6784 -1.2278 3.0837  
C -5.6197 1.4511 1.1813  
C -4.3321 1.1736 0.4889  
N -4.0163 1.6496 -0.7765  
C -3.2269 0.4724 0.8834  
C -2.7684 1.2352 -1.0982  
N -2.2593 0.5188 -0.1053  
H -5.6221 0.9659 2.1604  
H -6.4826 1.0714 0.6199  
H -5.7753 2.5253 1.3424  
H -3.0548 -0.0453 1.8142  
H -2.2523 1.4721 -2.0185  
H -4.6145 2.2164 -1.3620  
C 2.5466 4.9022 -0.9302  
C 1.6932 3.8015 -0.3969  
N 1.0120 3.8828 0.8105  
C 1.3867 2.5591 -0.8833  
C 0.3422 2.7240 1.0102  
N 0.5489 1.8964 -0.0034  
H 2.9779 4.6040 -1.8891  
H 3.3753 5.1438 -0.2530  
H 1.9734 5.8228 -1.0964  
H 1.6819 2.1053 -1.8149  
H -0.2552 2.4982 1.8814

H 1.0154 4.6730 1.4411  
C 5.5218 -0.8223 0.6130  
C 4.1254 -0.9011 0.1049  
N 3.7583 -1.5774 -1.0497  
C 2.9552 -0.3832 0.5881  
C 2.4211 -1.4449 -1.2217  
N 1.9035 -0.7300 -0.2365  
H 5.5459 -0.2383 1.5365  
H 6.1946 -0.3373 -0.1052  
H 5.9342 -1.8138 0.8371  
H 2.8079 0.2226 1.4667  
H 1.8676 -1.8540 -2.0524  
H 4.3832 -2.0794 -1.6660  
O -0.2732 1.0531 -2.8251  
H -0.2396 0.6961 -3.7296  
O -0.2616 -0.1872 -2.0702

22. non H-bonded Fe<sup>III</sup>-OOH S=1/2

Fe -0.0691 -0.0813 -0.0879  
C 0.3627 -3.5097 1.3109  
C -0.5418 -3.2207 0.1572  
N -0.7820 -1.9620 -0.4059  
C -1.2969 -4.1408 -0.5219  
C -1.6555 -2.1433 -1.3927  
N -1.9908 -3.4445 -1.4905  
H 0.4801 -4.5920 1.4224  
H -0.0471 -3.0986 2.2378  
H 1.3533 -3.0675 1.1692  
H -1.3976 -5.2069 -0.3912  
H -2.0064 -1.3633 -2.0530  
H -2.6386 -3.8338 -2.1604  
C 1.0461 -0.6004 3.4859  
S -0.3407 -0.3165 2.2746  
H 0.5646 -0.7346 4.4573  
H 1.7225 0.2590 3.5478  
H 1.6273 -1.4969 3.2505  
C -5.6592 0.7607 0.7858  
C -4.2080 0.8546 0.3977  
N -3.7052 1.9266 -0.3293  
C -3.1154 0.0485 0.6074  
C -2.3815 1.7417 -0.5322  
N -1.9839 0.6063 0.0205  
H -5.8332 -0.1576 1.3520  
H -6.3124 0.7426 -0.0948  
H -5.9630 1.6043 1.4168  
H -3.0529 -0.8726 1.1653

H -1.7614 2.4136 -1.1015  
H -4.2414 2.7132 -0.6683  
C 2.1507 5.0132 -1.0253  
C 1.5249 3.8149 -0.3851  
N 1.0985 3.7989 0.9350  
C 1.2273 2.5627 -0.8581  
C 0.5737 2.5825 1.2150  
N 0.6376 1.8057 0.1432  
H 2.3923 4.7930 -2.0681  
H 3.0806 5.3050 -0.5221  
H 1.4783 5.8797 -1.0137  
H 1.3741 2.1444 -1.8404  
H 0.1562 2.2829 2.1651  
H 1.1676 4.5656 1.5903  
C 5.5617 -1.0813 0.2190  
C 4.0954 -1.0412 -0.1187  
N 3.5777 -1.6844 -1.2342  
C 3.0001 -0.4485 0.4654  
C 2.2432 -1.4673 -1.2918  
N 1.8535 -0.7185 -0.2711  
H 5.7499 -0.5101 1.1314  
H 6.1698 -0.6448 -0.5821  
H 5.9088 -2.1074 0.3886  
H 2.9590 0.1541 1.3589  
H 1.6009 -1.8313 -2.0765  
H 4.1091 -2.2249 -1.9030  
O -1.1859 0.4424 -2.7061  
H -0.8243 0.4148 -3.6088  
O 0.0523 0.1824 -1.9641

23. non H-bonded Fe<sup>III</sup>-O<sub>2</sub><sup>-</sup> S=5/2

Fe -0.1889 -0.1081 -0.4534  
C -0.0148 -3.5856 1.3015  
C -1.1357 -3.3754 0.3440  
N -1.3003 -2.1762 -0.3263  
C -2.1232 -4.2461 -0.0433  
C -2.3552 -2.3201 -1.1049  
N -2.8956 -3.5572 -0.9638  
H -0.0875 -4.5701 1.7771  
H -0.0425 -2.8027 2.0676  
H 0.9556 -3.5196 0.7961  
H -2.3411 -5.2634 0.2445  
H -2.7237 -1.5717 -1.7880  
H -3.7073 -3.9091 -1.4484  
C 0.9861 -0.2745 3.3060  
S -0.5233 -0.1565 2.2657

H 0.6986 -0.2586 4.3636  
H 1.6747 0.5691 3.1445  
H 1.5466 -1.2021 3.1315  
C -5.3019 2.3071 1.1081  
C -4.0917 1.8479 0.3619  
N -3.6931 2.3731 -0.8636  
C -3.1315 0.9207 0.6689  
C -2.5333 1.7664 -1.2328  
N -2.1716 0.8808 -0.3240  
H -5.3873 1.7443 2.0415  
H -6.2292 2.1529 0.5399  
H -5.2470 3.3726 1.3683  
H -3.0389 0.3072 1.5531  
H -1.9700 1.9676 -2.1332  
H -4.1695 3.0949 -1.3844  
C 3.3039 4.4903 -0.9484  
C 2.3188 3.5374 -0.3675  
N 1.7762 3.6509 0.9075  
C 1.7525 2.4054 -0.8855  
C 0.9273 2.6020 1.1023  
N 0.8949 1.8352 0.0315  
H 3.5644 4.1702 -1.9611  
H 4.2351 4.5384 -0.3671  
H 2.9090 5.5133 -1.0175  
H 1.8785 1.9551 -1.8582  
H 0.3607 2.4050 2.0033  
H 1.9765 4.3782 1.5786  
C 5.3792 -1.6069 0.6395  
C 4.0052 -1.4770 0.0575  
N 3.5977 -2.0881 -1.1238  
C 2.8952 -0.7988 0.4887  
C 2.2949 -1.7638 -1.3489  
N 1.8433 -0.9853 -0.3852  
H 5.4368 -1.0289 1.5657  
H 6.1547 -1.2279 -0.0390  
H 5.6296 -2.6480 0.8818  
H 2.7861 -0.1892 1.3704  
H 1.7113 -2.0649 -2.2071  
H 4.1685 -2.6699 -1.7199  
O 0.0250 0.6785 -2.2424  
O -0.3844 -0.6827 -2.2970

24. non H-bonded Fe<sup>III</sup>-O<sub>2</sub><sup>-</sup> S=1/2

Fe -0.148441 -0.089228 -0.066311  
C 0.444835 -3.623516 1.232781  
C -0.535373 -3.294160 0.148451

|   |           |           |           |
|---|-----------|-----------|-----------|
| N | -0.820918 | -2.013364 | -0.336502 |
| C | -1.305078 | -4.204541 | -0.528871 |
| C | -1.732437 | -2.177622 | -1.282326 |
| N | -2.064667 | -3.480663 | -1.427266 |
| H | 0.416188  | -4.696483 | 1.448479  |
| H | 0.201035  | -3.062257 | 2.140728  |
| H | 1.467672  | -3.353442 | 0.947518  |
| H | -1.380219 | -5.277332 | -0.439351 |
| H | -2.143560 | -1.390211 | -1.888819 |
| H | -2.719325 | -3.849121 | -2.099575 |
| C | 1.063779  | -0.496871 | 3.410781  |
| S | -0.436175 | -0.201899 | 2.390967  |
| H | 0.751825  | -0.699987 | 4.441379  |
| H | 1.733171  | 0.374981  | 3.441168  |
| H | 1.650062  | -1.356065 | 3.063571  |
| C | -5.715850 | 1.341222  | 0.899153  |
| C | -4.310461 | 1.159364  | 0.378361  |
| N | -3.877858 | 1.757091  | -0.800270 |
| C | -3.208529 | 0.464431  | 0.825571  |
| C | -2.579833 | 1.412660  | -1.013334 |
| N | -2.138513 | 0.624748  | -0.047486 |
| H | -5.836756 | 0.785766  | 1.832899  |
| H | -6.465821 | 0.970272  | 0.188636  |
| H | -5.940681 | 2.395379  | 1.106280  |
| H | -3.092113 | -0.122195 | 1.725334  |
| H | -1.996100 | 1.709515  | -1.871391 |
| H | -4.430000 | 2.351053  | -1.401376 |
| C | 2.432173  | 4.814442  | -1.246410 |
| C | 1.652149  | 3.722346  | -0.569921 |
| N | 1.209668  | 3.804518  | 0.745556  |
| C | 1.226174  | 2.487864  | -0.993272 |
| C | 0.557066  | 2.650442  | 1.059151  |
| N | 0.551690  | 1.828925  | 0.024391  |
| H | 2.658430  | 4.519129  | -2.274504 |
| H | 3.385409  | 5.013697  | -0.739300 |
| H | 1.872961  | 5.758531  | -1.286194 |
| H | 1.340885  | 2.019337  | -1.958191 |
| H | 0.122329  | 2.407937  | 2.020497  |
| H | 1.346121  | 4.584387  | 1.371727  |
| C | 5.453813  | -0.827255 | 0.498332  |
| C | 4.016346  | -0.885972 | 0.071380  |
| N | 3.583246  | -1.599411 | -1.038895 |
| C | 2.870824  | -0.328637 | 0.581892  |
| C | 2.235913  | -1.449351 | -1.157624 |
| N | 1.771607  | -0.681656 | -0.184919 |
| H | 5.546043  | -0.211771 | 1.397398  |



|   |           |           |           |
|---|-----------|-----------|-----------|
| H | 6.095345  | -0.385345 | -0.275503 |
| H | 5.854763  | -1.821631 | 0.734841  |
| H | 2.763691  | 0.302100  | 1.449110  |
| H | 1.622027  | -1.803190 | -1.976663 |
| H | 4.166306  | -2.128226 | -1.670410 |
| O | -0.233641 | 0.218486  | -1.934348 |
| O | 0.103109  | -0.687848 | -2.863968 |

25. Fe<sup>III</sup>-OMe OOH

|    |           |           |           |
|----|-----------|-----------|-----------|
| Fe | -0.118627 | -0.347683 | 0.007254  |
| C  | 1.535650  | -3.216094 | 1.796278  |
| C  | 0.656467  | -3.519217 | 0.622443  |
| N  | -0.005826 | -2.549717 | -0.128459 |
| C  | 0.354896  | -4.750736 | 0.100819  |
| C  | -0.681573 | -3.191428 | -1.070820 |
| N  | -0.493766 | -4.524259 | -0.966792 |
| H  | 2.023036  | -4.129675 | 2.148395  |
| H  | 0.953559  | -2.794383 | 2.621321  |
| H  | 2.310226  | -2.488290 | 1.534871  |
| H  | 0.661180  | -5.743638 | 0.391710  |
| H  | -1.276108 | -2.716191 | -1.834425 |
| H  | -0.902349 | -5.228388 | -1.564659 |
| O  | -0.183991 | -0.363814 | 1.848727  |
| C  | -5.810297 | 0.423892  | 0.919443  |
| C  | -4.459157 | 0.204716  | 0.323932  |
| N  | -4.195755 | 0.416463  | -1.022527 |
| C  | -3.256180 | -0.191893 | 0.851367  |
| C  | -2.889205 | 0.153250  | -1.260437 |
| N  | -2.291027 | -0.219920 | -0.139484 |
| H  | -5.785847 | 0.209844  | 1.991127  |
| H  | -6.567974 | -0.229347 | 0.468981  |
| H  | -6.147323 | 1.460501  | 0.794160  |
| H  | -3.012512 | -0.461395 | 1.868116  |
| H  | -2.391055 | 0.293576  | -2.209057 |
| H  | -4.867074 | 0.725096  | -1.712338 |
| C  | 0.736751  | 5.455088  | -0.541987 |
| C  | 0.286619  | 4.085355  | -0.151498 |
| N  | -0.491006 | 3.845451  | 0.972845  |
| C  | 0.491547  | 2.844411  | -0.699974 |
| C  | -0.713696 | 2.512513  | 1.066453  |
| N  | -0.130671 | 1.875153  | 0.065213  |
| H  | 1.325787  | 5.404717  | -1.461412 |
| H  | 1.365532  | 5.914298  | 0.231088  |
| H  | -0.109702 | 6.128098  | -0.727001 |
| H  | 1.020401  | 2.579070  | -1.601445 |
| H  | -1.291081 | 2.048391  | 1.850172  |

|   |           |           |           |
|---|-----------|-----------|-----------|
| H | -0.828261 | 4.545963  | 1.618634  |
| C | 5.553349  | 0.962132  | 0.471147  |
| C | 4.226509  | 0.427187  | 0.058981  |
| N | 4.008313  | -0.190719 | -1.163732 |
| C | 3.001393  | 0.420677  | 0.672820  |
| C | 2.700264  | -0.529618 | -1.249835 |
| N | 2.061160  | -0.173066 | -0.148334 |
| H | 5.484741  | 1.400430  | 1.470193  |
| H | 5.908318  | 1.744812  | -0.211072 |
| H | 6.320723  | 0.178676  | 0.505812  |
| H | 2.737149  | 0.815890  | 1.641427  |
| H | 2.234592  | -0.999501 | -2.101404 |
| H | 4.708028  | -0.357452 | -1.873877 |
| O | -0.285725 | 0.672467  | -2.737809 |
| H | -0.041668 | 0.334221  | -3.616482 |
| O | -0.092434 | -0.540615 | -1.946721 |
| C | 0.401430  | 0.004192  | 3.052528  |
| H | -0.270449 | -0.205334 | 3.900367  |
| H | 0.639375  | 1.083611  | 3.082744  |
| H | 1.341715  | -0.540401 | 3.240802  |

26. Fe<sup>III</sup>-OMe O<sub>2</sub>H<sub>2</sub>

|    |           |           |           |
|----|-----------|-----------|-----------|
| Fe | -0.117570 | -0.297911 | 0.307012  |
| C  | 0.790782  | -3.475838 | 1.795282  |
| C  | -0.014387 | -3.487764 | 0.534274  |
| N  | -0.386739 | -2.344376 | -0.187055 |
| C  | -0.519871 | -4.582415 | -0.115217 |
| C  | -1.095164 | -2.768192 | -1.235347 |
| N  | -1.193426 | -4.108527 | -1.222749 |
| H  | 0.985113  | -4.500304 | 2.121929  |
| H  | 0.259348  | -2.957451 | 2.599745  |
| H  | 1.754540  | -2.974492 | 1.656345  |
| H  | -0.460812 | -5.634843 | 0.115997  |
| H  | -1.519340 | -2.142596 | -2.005247 |
| H  | -1.689641 | -4.671311 | -1.902053 |
| C  | 0.265773  | -0.007997 | 3.362371  |
| O  | -0.195778 | -0.311773 | 2.072494  |
| H  | -0.437680 | -0.394525 | 4.109650  |
| H  | 0.354383  | 1.079936  | 3.493143  |
| H  | 1.248563  | -0.465633 | 3.536607  |
| C  | -5.673629 | 1.212886  | 1.047695  |
| C  | -4.352000 | 0.819551  | 0.452474  |
| N  | -4.112248 | 0.891622  | -0.911076 |
| C  | -3.166295 | 0.360342  | 0.978733  |
| C  | -2.846179 | 0.498924  | -1.165587 |
| N  | -2.229125 | 0.165825  | -0.035325 |

|   |           |           |           |
|---|-----------|-----------|-----------|
| H | -5.650994 | 1.087139  | 2.132683  |
| H | -6.488136 | 0.592816  | 0.656349  |
| H | -5.911845 | 2.261000  | 0.833262  |
| H | -2.924277 | 0.144371  | 2.008337  |
| H | -2.427727 | 0.462377  | -2.159216 |
| H | -4.786191 | 1.180553  | -1.609712 |
| C | 1.775879  | 5.080322  | -0.872780 |
| C | 1.015521  | 3.896140  | -0.384601 |
| N | -0.066452 | 3.982817  | 0.474373  |
| C | 1.172894  | 2.551354  | -0.603666 |
| C | -0.516981 | 2.738116  | 0.744929  |
| N | 0.214048  | 1.834747  | 0.103529  |
| H | 2.578519  | 4.761311  | -1.541889 |
| H | 2.231541  | 5.636017  | -0.044791 |
| H | 1.134091  | 5.774861  | -1.427466 |
| H | 1.952148  | 2.060641  | -1.167325 |
| H | -1.364835 | 2.529390  | 1.379616  |
| H | -0.451386 | 4.840764  | 0.851473  |
| C | 5.664860  | 0.370412  | 0.455240  |
| C | 4.272664  | -0.115136 | 0.174412  |
| N | 3.994892  | -1.088285 | -0.776656 |
| C | 3.039847  | 0.228880  | 0.672679  |
| C | 2.661370  | -1.290635 | -0.830428 |
| N | 2.037536  | -0.499482 | 0.036447  |
| H | 5.644142  | 1.134535  | 1.235788  |
| H | 6.121723  | 0.811167  | -0.438274 |
| H | 6.313180  | -0.442883 | 0.800755  |
| H | 2.810573  | 0.956998  | 1.435481  |
| H | 2.189825  | -2.001632 | -1.490623 |
| H | 4.684976  | -1.580897 | -1.330712 |
| O | -0.734298 | -0.284694 | -3.309449 |
| O | 0.198138  | 0.059669  | -2.252577 |
| H | -0.125924 | -0.556108 | -4.024730 |
| H | 0.228541  | 1.034767  | -2.324393 |
